# Supplementary material for: School racial segregation and long-term cardiovascular health among Black adults in the US: A quasi-experimental study
Source: PubMed Central journal article supplement (PMC9258802; doi:10.1371/journal.pmed.1004031), 2022-06-21

**S1 Figure.** Flowchart of sample selection

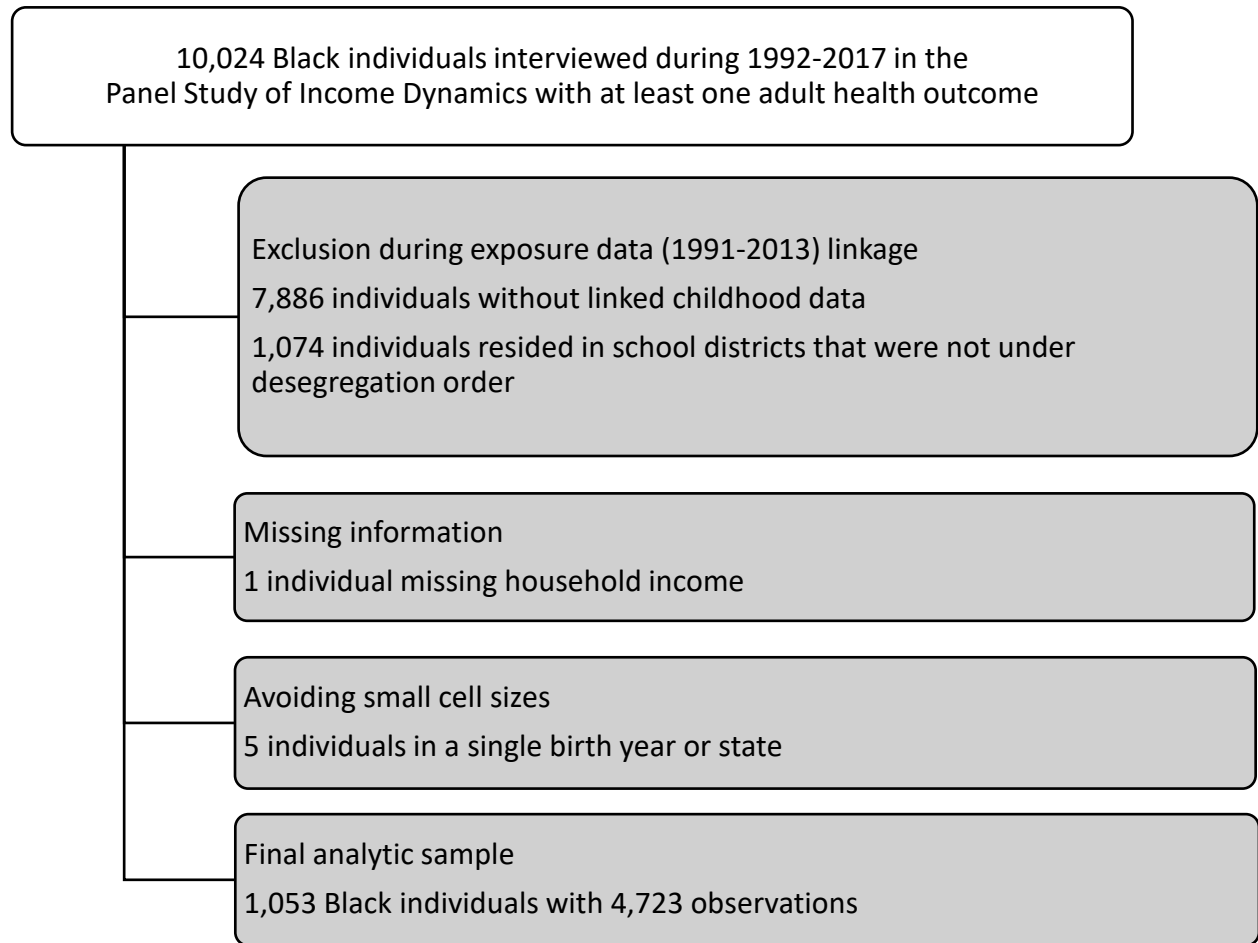

Supplement: pmed.1004031.s003.pdf [file pmed.1004031.s003.pdf]
