# Supplementary material for: School racial segregation and long-term cardiovascular health among Black adults in the US: A quasi-experimental study
Source: PubMed Central journal article supplement (PMC9258802; doi:10.1371/journal.pmed.1004031), 2022-06-21

**S2 Figure.** Instrumental variables design. Directed acyclic graph (i.e., causal diagram) illustrating the relationship between an instrumental variable  $Z$ , an endogenous predictor or treatment  $X$ , unmeasured confounders  $U$ , and an outcome  $Y$ . This method rests on several assumptions, including the assumption that there does not exist a separate causal pathway  $W$  linking the instrument and outcome. *CVD*, cardiovascular disease; *SES*, socioeconomic status.

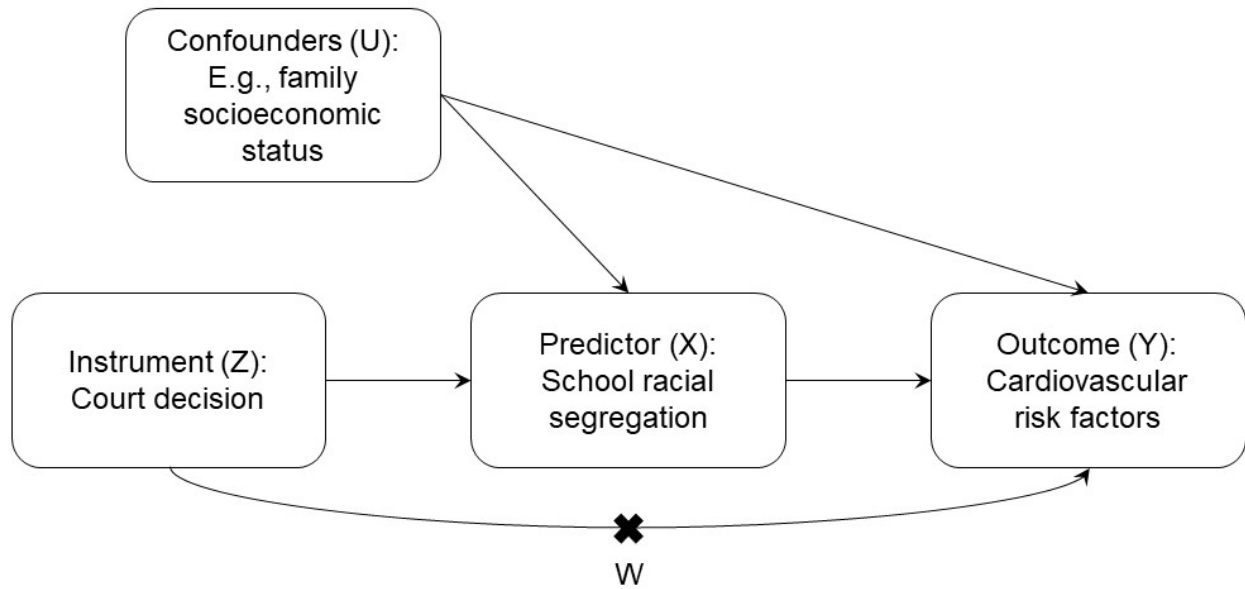

Supplement: pmed.1004031.s004.pdf [file pmed.1004031.s004.pdf]
